# Supplementary material
Source: PubMed Central journal article supplement (PMC5710571)
Supplement: jamainternmed-177-1326-s001.pdf [file jamainternmed-177-1326-s001.pdf]

## Supplementary Online Content

Bhatia RS, Buock Z, Ivers NM, et al. Electrocardiograms in low-risk patients undergoing an annual health examination [published online July 10, 2017]. *JAMA Intern Med*. doi:10.1001/jamainternmed.2017.2649

**eAppendices.** Search strategy for Medline (using PubMed)

This supplementary material has been provided by the authors to give readers additional information about their work.

### APPENDIX 1

#### INCLUSION CRITERIA

##### Index event

- Adult patients (age 18+) with an OHIP claim for a periodic health visit (FEECODE = K131, K132) or annual health examination (A003 with DXCODE = 917) with a family physician (SPEC = 00 = “Family practice and general practice”) occurring within April 1<sup>st</sup>, 2010 and March 31<sup>st</sup>, 2014
- Only the first eligible visit/examination was included in analysis

##### Outcomes

##### **Primary outcome**

*Receipt of an electrocardiogram* – claim in OHIP with fee code G310 or G313 within 30 days of index event

*Note:* where an ECG was claimed on the same day as an emergency department visit [NACRS], the tests were not counted as they may have been conducted as part of ED or hospital admissions screening process.

##### **Secondary outcomes**

*Additional testing or procedures* – any of the following claimed within 3 months of index event:

- Visits to cardiologists or cardiac surgeons: see related high-risk exclusion(s) for codes
- Transthoracic echocardiogram:
  - [OHIP] fee codes = G560, G561, G562, G566, G567, G568, G570, G571, G572, G574, G575, G576, G577, G578
- Cardiac stress test:
  - *Stress test*: [OHIP] fee codes = maximal stress ECG (G315, G319), stress echocardiogram (G582, G583, G584)
  - *Nuclear stress test*: [OHIP] fee codes = dobutamine stress test (G174), dipyramide Thallium stress test (G111, G112), myocardial perfusion scintigraphy (J607, J807, J608, J808, J609, J809, J666, J866)
- Cardiac catheterization procedure: [OHIP] fee codes: Z439 to G288

### **Tertiary outcomes**

*Adverse outcomes* – any of the following claimed within 12 months of index event:

- Death [RPDB] – DTHDATE within 12 months of index event
- Cardiac-related hospitalization: [DAD] at least 1 admission with the following ICD-10 codes:
  - Coronary artery disease: I20, I21, I22, I23, I24, I25; atrial fibrillation/flutter: I48; other cardiac arrhythmia: I44, I45, I46, I47, I49; cardiac valvular disease: I05, I06, I07, I08, I09.1, I09.8, I34, I35, I36, I37, I38; heart failure: I50; venous thromboembolism: I80.1, I80.2, I80.8, I82.2, I82.3, I82.8, I82.9
  - Symptoms and signs involving the circulatory and respiratory systems, not elsewhere classified: R00 = abnormalities of heart beat; R01 = cardiac murmurs and other cardiac sounds; R03 = abnormal blood pressure reading, without diagnosis; R06 = abnormalities of breathing; R07 = pain in throat and chest; R09 = other symptoms and signs involving the circulatory and respiratory system
- Coronary revascularization (PCI or CABG):
  - [DAD] CCI codes: PCI (1IJ50, 1IJ57); CABG (1IJ76)
  - [OHIP] fee codes Z434, Z448, Z449, Z460, Z461, R742, R743

### **EXCLUSION CRITERIA**

#### Long-term care resident

- Lookback one year from index event and exclude if any OHIP claims with LOCATION='L' or ODB claims with LTC='1'

#### High-risk exclusions

*Note:* Patients excluded if they met any of the following criteria within three years prior of their index event (unless otherwise noted\*).

| <i>Cardiovascular signs, symptoms, and diagnoses – two or more physician claims with the following diagnostic codes within a two year period in OHIP data</i> |                                                                                   |                                |                                                                                                                |
|---------------------------------------------------------------------------------------------------------------------------------------------------------------|-----------------------------------------------------------------------------------|--------------------------------|----------------------------------------------------------------------------------------------------------------|
| 398                                                                                                                                                           | Other rheumatic heart disease                                                     | 401-402                        | Essential, benign hypertension; hypertensive heart disease                                                     |
| 410                                                                                                                                                           | Acute myocardial infarction                                                       | 412                            | Old myocardial infarction, chronic coronary artery disease or arteriosclerotic heart disease, without symptoms |
| 413                                                                                                                                                           | Acute coronary insufficiency, angina pectoris, acute ischaemic heart disease      | 415                            | Pulmonary embolism, pulmonary infarction                                                                       |
| 426                                                                                                                                                           | Heart blocks, other conduction disorders                                          | 427                            | Paroxysmal tachycardia, atrial or ventricular flutter of fibrillation, cardiac arrest, other arrhythmias       |
| 428                                                                                                                                                           | Congestive heart failure                                                          | 429                            | All other forms of heart disease (e.g. pericarditis)                                                           |
| 746                                                                                                                                                           | Other congenital anomalies of the heart (includes acute congenital heart disease) | 785                            | Chest pain, tachycardia, syncope, shock, edema, masses                                                         |
| <i>Cardiovascular signs, symptoms, and diagnoses – one or more hospital admissions with the following ICD-10 codes in CIHI-DAD data</i>                       |                                                                                   |                                |                                                                                                                |
| I20-I25                                                                                                                                                       | Coronary artery disease                                                           | I48                            | Atrial fibrillation/flutter                                                                                    |
| I44-I49                                                                                                                                                       | Other cardiac arrhythmia                                                          | I05-I08, I09.1, I09.9, 134-I38 | Cardiac valvular disease                                                                                       |
| I80.1, I80.2, 180.8, 182.2, I82.3, I82.8, I82.9                                                                                                               | Venous thromboembolism                                                            | R00                            | Abnormalities of heart beat                                                                                    |
| R01                                                                                                                                                           | Cardiac murmurs and other cardiac sounds                                          | R03                            | Abnormal blood pressure reading, without diagnosis                                                             |
| R06                                                                                                                                                           | Abnormalities of breathing                                                        | R07                            | Pain in throat and chest                                                                                       |
| R09                                                                                                                                                           | Other symptoms and signs involving the circulatory and                            |                                |                                                                                                                |

|                                                                                                                                                                             |                                                                                              |                                  |                                                                               |
|-----------------------------------------------------------------------------------------------------------------------------------------------------------------------------|----------------------------------------------------------------------------------------------|----------------------------------|-------------------------------------------------------------------------------|
|                                                                                                                                                                             | respiratory system                                                                           |                                  |                                                                               |
| <i>Cerebrovascular and peripheral vascular disease diagnoses – two or more physician claims with the following diagnostic codes within a two year period in OHIP data</i>   |                                                                                              |                                  |                                                                               |
| 432                                                                                                                                                                         | Intracranial haemorrhage                                                                     | 435                              | Transient cerebral ischaemia                                                  |
| 436                                                                                                                                                                         | Acute cerebrovascular accident, C.V.A, stroke                                                | 437                              | Chronic arteriosclerotic cerebrovascular disease, hypertensive encephalopathy |
| 440                                                                                                                                                                         | Generalized arteriosclerosis, athlerosclerosis                                               | 441                              | Aortic aneurysm (non-syphilitic)                                              |
| 443                                                                                                                                                                         | Raynaud’s disease, Buerger’s disease, peripheral vascular disease, intermittent claudication |                                  | Polyarteritis nodosa, temporal arteritis                                      |
| 446                                                                                                                                                                         | Other disorders of the arteries                                                              | 451                              | Phlebitis, thrombophlebitis                                                   |
| 452                                                                                                                                                                         | Portal vein thrombosis                                                                       |                                  |                                                                               |
| <i>Cerebrovascular and peripheral vascular disease diagnoses – one or more hospital admissions with the following ICD-10 codes in CIHI-DAD data</i>                         |                                                                                              |                                  |                                                                               |
| I60, I61, I63, I64, G45, G46, H34                                                                                                                                           |                                                                                              | Previous cerebrovascular disease |                                                                               |
| I70, I71, I73.1, I73.8, I73.9, I77.1, I79.0, I79.2, K55.1, K55.8, K55.9, Z95.8, Z95.9                                                                                       |                                                                                              | Peripheral vascular disease      |                                                                               |
| I80.1, I80.2, I80.8, I82.2, I82.3, I82.8, I82.9                                                                                                                             |                                                                                              | Venous thromboembolism           |                                                                               |
| Signs, symptoms, and conditions associated with a high-risk of CVD – two or more physician claims with the following diagnostic codes within a two year period in OHIP data |                                                                                              |                                  |                                                                               |
| 042-044                                                                                                                                                                     | AIDS, AIDS-related complex (A.R.C.), or other human immunodeficiency virus infection         | 403                              | Hypertensive renal disease                                                    |
| 584                                                                                                                                                                         | Acute renal failure                                                                          | 585                              | Chronic renal failure, uremia                                                 |
| Signs, symptoms & conditions associated with a high-risk of CVD – one or more hospital admissions with the following ICD-10 codes in CIHI-DAD data                          |                                                                                              |                                  |                                                                               |
| B20-B24                                                                                                                                                                     |                                                                                              | Human immunodeficiency virus     |                                                                               |
| I12, I13, N03.2-N03.7, N05.2-N05.7, N17, N18, N19, N25.0, Z49, Z94.0, Z99.2                                                                                                 |                                                                                              | Chronic renal disease            |                                                                               |
| Signs, symptoms & conditions associated with a high-risk of CVD – any of the following at any point prior to cohort entry*:                                                 |                                                                                              |                                  |                                                                               |
| <ul style="list-style-type: none"> <li>Heart failure diagnosis indicated in Congestive Heart Failure (CHF) database</li> </ul>                                              |                                                                                              |                                  |                                                                               |

|                                                                                                                                                                          |                                                                                                     |      |                                                                                        |
|--------------------------------------------------------------------------------------------------------------------------------------------------------------------------|-----------------------------------------------------------------------------------------------------|------|----------------------------------------------------------------------------------------|
| <ul style="list-style-type: none"> <li>• Diabetes diagnosis indicated in Ontario Diabetes Database (ODD)</li> <li>• Hypertension diagnosis indicated in HYPER</li> </ul> |                                                                                                     |      |                                                                                        |
| Prior visits to cardiologists of cardiac surgeons – one or more OHIP claims with the following fee codes:                                                                |                                                                                                     |      |                                                                                        |
| <i>Cardiology outpatient visit</i>                                                                                                                                       |                                                                                                     |      |                                                                                        |
| A600                                                                                                                                                                     | Comprehensive cardiology consultation                                                               | A601 | Complex medical specific re-assessment                                                 |
| A603                                                                                                                                                                     | Medical specific assessment                                                                         | A604 | Medical specific re-assessment                                                         |
| A605                                                                                                                                                                     | Consultation                                                                                        | A606 | Repeat consultation                                                                    |
| A608                                                                                                                                                                     | Partial assessment                                                                                  | A675 | Limited consultation                                                                   |
| <i>Cardiothoracic surgery outpatient visit</i>                                                                                                                           |                                                                                                     |      |                                                                                        |
| A093                                                                                                                                                                     | Specific assessment                                                                                 | A094 | Partial assessment                                                                     |
| A095                                                                                                                                                                     | Consultation                                                                                        | A096 | Repeat consultation                                                                    |
| A935<br>(with<br>SPEC=09)                                                                                                                                                | Special surgical consultation                                                                       |      |                                                                                        |
| <i>Non-emergency hospital inpatient visit with MRP being a cardiologist (SPEC=60) or cardiothoracic surgeon (SPEC=09)</i>                                                |                                                                                                     |      |                                                                                        |
| C600                                                                                                                                                                     | Comprehensive cardiology consultation                                                               | C601 | Complex medical specific re-assessment                                                 |
| C602                                                                                                                                                                     | subsequent visits, first 5 weeks                                                                    | C603 | Medical specific assessment                                                            |
| C604                                                                                                                                                                     | Medical specific re-assessment                                                                      | C605 | Consultation                                                                           |
| C606                                                                                                                                                                     | Repeat consultation                                                                                 | C607 | subsequent visits, 6 <sup>th</sup> -13 <sup>th</sup> week                              |
| C608                                                                                                                                                                     | subsequent visits by MRP following transfer from ICU, concurrent care                               | C609 | subsequent visits, after 13 <sup>th</sup> week                                         |
| C121                                                                                                                                                                     | subsequent visits by MRP following transfer from ICU, additional visits due to intercurrent illness | C122 | subsequent visits by MRP, day following admission assessment                           |
| C123                                                                                                                                                                     | subsequent visit by MRP, second day following hospital assessment                                   | C124 | day of discharge                                                                       |
| C142                                                                                                                                                                     | subsequent visits by MRP following transfer from ICU, 1 <sup>st</sup> subsequent visit              | C143 | subsequent visits by MRP following transfer from ICU, 2 <sup>nd</sup> subsequent visit |
| C675                                                                                                                                                                     | Limited consultation                                                                                |      |                                                                                        |

|                                                                      |                                      |                                                                                                                                         |                          |
|----------------------------------------------------------------------|--------------------------------------|-----------------------------------------------------------------------------------------------------------------------------------------|--------------------------|
| C935<br>(with<br>SPEC=09<br>only)                                    | Special surgical consultation        |                                                                                                                                         |                          |
| Prior cardiac procedures – any of the following based OHIP fee codes |                                      |                                                                                                                                         |                          |
| R738,<br>R863                                                        | Aortic valve replacement             | R735                                                                                                                                    | Mitral valve replacement |
| Z434,<br>R742,<br>R743                                               | Coronary artery<br>revascularization | R761, R753,<br>R752                                                                                                                     | Device implantation      |
| Prior cardiac procedures – any of the following based OHIP fee codes |                                      |                                                                                                                                         |                          |
| 1HV90                                                                | Aortic valve replacement             | 1HU90                                                                                                                                   | Mitral valve replacement |
| 1IJ26,<br>1IJ50,<br>1IJ55,<br>1IJ57,<br>1IJ76,<br>1IJ80              | Coronary artery<br>revascularization | 1HZ53GRFS,<br>1HZ53LAFS,<br>1HZ53GRNM,<br>1HZ53LANM,<br>1HZ53GRNK,<br>1HZ53LANK,<br>1HZ53GRNL,<br>1HZ53LANL,<br>1HZ53GRFR,<br>1HZ53LAFR | Device implantation      |

**Appendix 2.0: Rates of ECG ordering by region (Local Health Integration Network)**

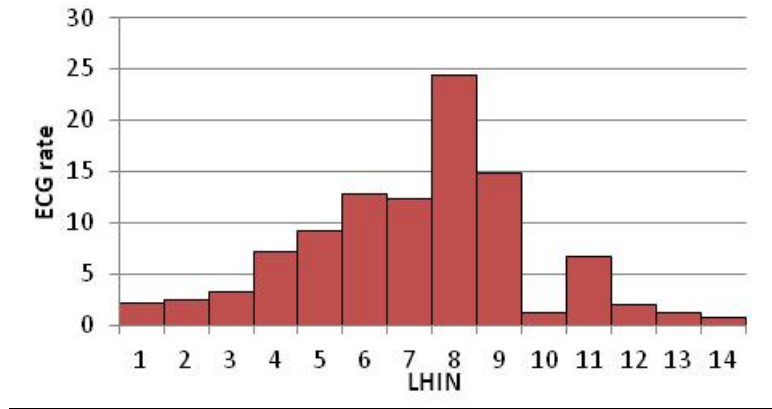

## Appendix 2.1: Rates of ECG ordering by primary care provider

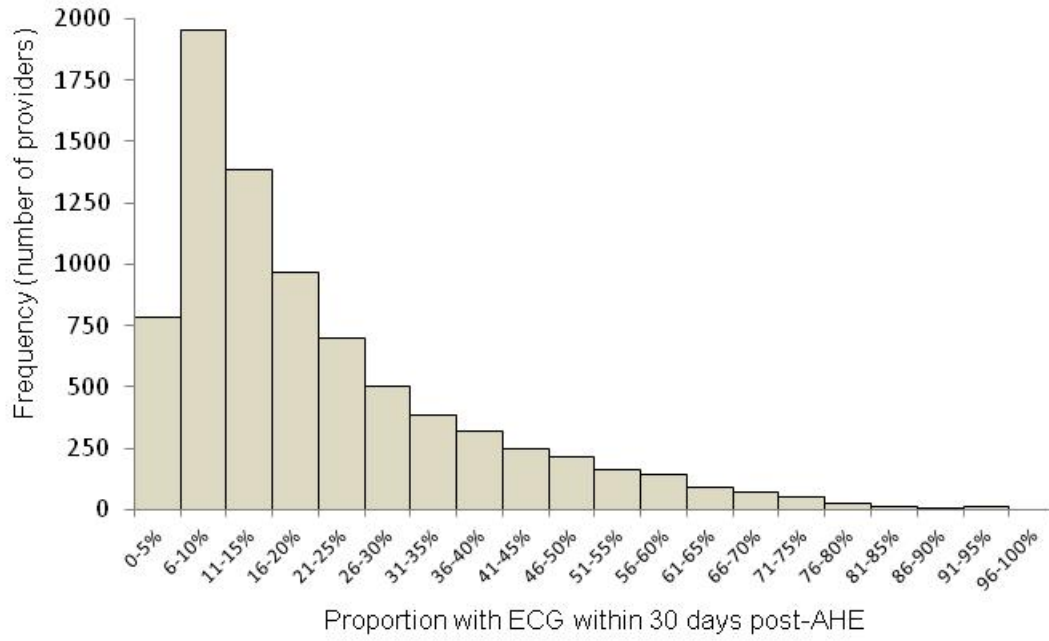



**Appendix 2.2.** Association between patient- and provider-level characteristics and having a potentially low-value ECG on the same day as an annual health examination ( $N = 2\,873\,357$ )

| <u>Fixed Effects</u>            | Odds Ratio <sup>a</sup> (95% CI) |
|---------------------------------|----------------------------------|
| <i>Patient characteristics</i>  |                                  |
| Age group                       |                                  |
| 45-64 y v 18-44 y               | 3.02 (2.99-3.04)*                |
| ≥ 65 y v 18-44 y                | 3.72 (3.66-3.79)*                |
|                                 |                                  |
| Male                            | 1.06 (1.05-1.07)*                |
|                                 |                                  |
| Rural                           | 0.73 (0.72-0.75)*                |
|                                 |                                  |
| Neighbourhood income quintile   |                                  |
| 2 v 1 (lowest)                  | 1.10 (1.09-1.12)*                |
| 3 v 1 (lowest)                  | 1.13 (1.12-1.15)*                |
| 4 v 1 (lowest)                  | 1.15 (1.14-1.17)*                |
| 5 v 1 (lowest)                  | 1.14 (1.12-1.15)*                |
|                                 |                                  |
| Hospital admission in past 3 y  | 1.00 (0.98-1.02)                 |
|                                 |                                  |
| Cancer                          | 1.37 (1.35-1.38)*                |
|                                 |                                  |
| COPD                            | 1.02 (1.01-1.05)*                |
|                                 |                                  |
| Asthma                          | 0.86 (0.85-0.87)*                |
|                                 |                                  |
| Mental health                   | 1.03 (1.02-1.04)*                |
|                                 |                                  |
| Dementia                        | 0.85 (0.80-0.92)*                |
|                                 |                                  |
| Rheumatologic disease           | 1.18 (1.16-1.21)*                |
|                                 |                                  |
|                                 |                                  |
| <i>Provider characteristics</i> |                                  |
| Male                            | 1.24 (1.23-1.25)*                |
|                                 |                                  |
| IMG                             | 1.09 (1.08-1.10)*                |
|                                 |                                  |
| Years since graduation (mean)   |                                  |
| 21-30 y vs 0-20 y               | 1.03 (1.02-1.04)*                |
| > 30 y v 0-20 y                 | 1.17 (1.16-1.19)*                |
|                                 |                                  |
| Organizational structure        |                                  |

|                                  |                                 |
|----------------------------------|---------------------------------|
| Family health group v FFS        | 1.68 (1.65-1.70)*               |
| Family health network v FFS      | 1.07 (0.86-1.34)                |
| Family health organization v FFS | 1.35 (1.31-1.40)*               |
| Family health team v FFS         | 0.94 (0.90-0.98)                |
| Other v FFS                      | 1.93 (1.85-2.02)*               |
|                                  |                                 |
| Practice                         | 3.02 (2.88-3.17)*, <sup>a</sup> |
|                                  |                                 |

*Note:* \* $p < .05$ ; CI = confidence interval; all reported values based on SAS PROC GLIMMIX output; model estimation method = RSPL; denominator degrees of freedom estimation method = between and within (bw); covariance structure = standard variance (vc).

<sup>a</sup> All odds ratios presented are adjusted for all other factors in the table.

<sup>b</sup> Median odds ratio reported with 95% CI in parentheses.

**Appendix 2.3** Descriptive statistics for downstream cardiac tests and consultations occurring with 12 months of index annual health examination (n = 3 629 859).

| Clinical outcome                     | No. without ECG in 30 d (%)<br>(n = 2 851 524) | No. with ECG in 30 d (%)<br>(n = 778 335) |
|--------------------------------------|------------------------------------------------|-------------------------------------------|
| Cardiac consultations, n (%)         | 24 687 (0.87%)                                 | 32 589 (4.19%)                            |
| Transthoracic echocardiograms, n (%) | 45 541 (1.60%)                                 | 76 282 (9.80%)                            |
| Cardiac stress tests, n (%)          | 23 897 (0.84%)                                 | 38 045 (4.89%)                            |
| Nuclear stress tests, n (%)          | 9 182 (0.32%)                                  | 13 348 (1.71%)                            |
| Cardiac catheterizations, n (%)      | 778 (0.03%)                                    | 2 253 (0.29%)                             |

**Appendix 2.4.** Patient- and provider-level indicators for a downstream cardiac consultation, test or procedure within 3 months after an annual health examination, with or without a same day ECG: *N* = 2 352 324.

|                                 | Cardiac consultations    | TTE                      | Nuclear stress test      |
|---------------------------------|--------------------------|--------------------------|--------------------------|
| <u>Fixed Effects</u>            | OR <sup>a</sup> (95% CI) | OR <sup>a</sup> (95% CI) | OR <sup>a</sup> (95% CI) |
| <i>Patient characteristics</i>  |                          |                          |                          |
|                                 |                          |                          |                          |
| ECG by AHE on the same day      | 1.58 (1.54-1.63)*        | 1.95 (1.91-1.98)*        | 1.74 (1.67-1.81)*        |
| Physician ECG ordering quintile |                          |                          |                          |
| 2 v 1 (lowest)                  | 1.19 (1.14-1.24)*        | 1.39 (1.34-1.44)*        | 1.14 (1.06-1.23)*        |
| 3 v 1 (lowest)                  | 1.36 (1.30-1.42)*        | 1.80 (1.73-1.86)*        | 1.35 (1.25-1.45)*        |
| 4 v 1 (lowest)                  | 1.31 (1.26-1.38)*        | 2.07 (1.99-2.14)*        | 1.51 (1.41-1.63)*        |
| 5 v 1 (lowest)                  | 0.92 (0.88-0.97)*        | 1.63 (1.57-1.69)*        | 1.27 (1.17-1.37)*        |
|                                 |                          |                          |                          |
| Age group                       |                          |                          |                          |
| 45-64 y v 18-44 y               | 2.13 (2.08-2.18)*        | 1.74 (1.71-1.77)*        | 4.35 (4.17-4.53)*        |
| ≥ 65 y v 18-44 y                | 4.06 (3.92-4.20)*        | 3.02 (2.94-3.09)*        | 8.58 (8.13-9.05)*        |
|                                 |                          |                          |                          |
| Male                            | 1.88 (1.84-1.92)*        | 1.34 (1.32-1.36)*        | 1.40 (1.35-1.45)*        |
|                                 |                          |                          |                          |
| Neighbourhood income quintile   |                          |                          |                          |
| 2 v 1 (lowest)                  | 1.02 (0.98-1.05)         | 0.91 (0.89-0.93)*        | 0.96 (0.91-1.01)         |
| 3 v 1 (lowest)                  | 1.02 (0.98-1.05)         | 0.93 (0.91-0.95)*        | 0.94 (0.89-0.99)*        |
| 4 v 1 (lowest)                  | 1.04 (1.01-1.07)*        | 0.90 (0.87-0.91)*        | 0.96 (0.91-1.01)         |
| 5 v 1 (lowest)                  | 1.04 (1.01-1.08)*        | 0.90 (0.88-0.92)*        | 0.94 (0.89-0.99)*        |
|                                 |                          |                          |                          |

|                                  |                   |                   |                   |
|----------------------------------|-------------------|-------------------|-------------------|
| Hospital admission last 3 y      | 1.41 (1.35-1.47)* | 0.90 (0.87-0.93)* | 0.98 (0.91-1.06)  |
|                                  |                   |                   |                   |
| Cancer                           | 1.83 (1.78-1.89)* | 1.17 (1.14-1.19)* | 1.84 (1.76-1.91)* |
|                                  |                   |                   |                   |
| COPD                             | 1.15 (1.10-1.21)* | 1.04 (1.01-1.08)* | 1.24 (1.17-1.32)* |
|                                  |                   |                   |                   |
| Asthma                           | 1.03 (1.00-1.07)  | 0.95 (0.93-0.98)* | 0.99 (0.94-1.04)  |
|                                  |                   |                   |                   |
| Mental health                    | 1.21 (1.18-1.25)* | 0.97 (0.95-0.99)* | 1.07 (1.02-1.12)* |
|                                  |                   |                   |                   |
| Dementia                         | 1.40 (1.24-1.58)* | 0.93 (0.84-1.05)  | 0.97 (0.79-1.19)  |
|                                  |                   |                   |                   |
| Rheumatologic disease            | 1.51 (1.45-1.57)* | 1.09 (1.05-1.13)* | 1.26 (1.18-1.34)* |
|                                  |                   |                   |                   |
| Rural                            | 1.00 (0.97-1.05)  | 0.96 (0.92-0.99)* | 0.85 (0.79-0.92)* |
|                                  |                   |                   |                   |
| <i>Provider characteristics</i>  |                   |                   |                   |
| Male                             | 0.94 (0.91-0.96)* | 0.98 (0.96-0.99)* | 1.06 (1.02-1.10)* |
|                                  |                   |                   |                   |
| IMG                              | 1.15 (1.12-1.18)* | 1.17 (1.15-1.19)* | 1.21 (1.16-1.26)* |
|                                  |                   |                   |                   |
| Years since graduation (mean)    |                   |                   |                   |
| 21-30 y vs 0-20 y                | 0.91 (0.88-0.93)* | 0.92 (0.91-0.94)* | 0.87 (0.84-0.91)* |
| > 30 y v 0-20 y                  | 0.86 (0.83-0.88)* | 0.84 (0.83-0.86)* | 0.83 (0.80-0.87)* |
|                                  |                   |                   |                   |
| Organizational structure         |                   |                   |                   |
| Family health group v FFS        | 0.90 (0.86-0.93)* | 0.88 (0.85-0.90)* | 0.89 (0.84-0.95)* |
| Family health network v FFS      | 1.09 (0.80-1.47)  | 1.26 (0.97-1.62)  | 0.85 (0.53-1.38)  |
| Family health organization v FFS | 0.88 (0.83-0.93)* | 0.85 (0.81-0.88)* | 0.79 (0.73-0.86)* |
| Family health team v FFS         | 0.95 (0.90-1.00)  | 0.88 (0.84-       | 0.80 (0.74-       |

|                       |                   |                   |                   |
|-----------------------|-------------------|-------------------|-------------------|
|                       |                   | 0.93)*            | 0.86)*            |
| Other v FFS           | 0.87 (0.78-0.97)* | 0.55 (0.52-0.59)* | 0.82 (0.70-0.96)* |
|                       |                   |                   |                   |
| <u>Random Effects</u> |                   |                   |                   |
| Practice <sup>c</sup> | 1.45 (1.43-1.47)* | 1.57 (1.55-1.60)* | 1.55 (1.52-1.59)* |

Note: ;\*p < .05; OR = odds ratio; CI = confidence interval; TTE = transthoracic echocardiogram; ECG = electrocardiogram; AHE = annual health examination; all reported values based on SAS PROC GLIMMIX output; model estimation method = RSPL; denominator degrees of freedom estimation method = between and within (bw); covariance structure = standard variance (vc).

a All odds ratios presented are adjusted for all other factors in the table.

b Indicates patient had an ECG on same day as an AHE.

c Median odds ratio reported with 95% CI in parentheses.

**Appendix 2.5** Descriptive statistics for adverse clinical outcomes occurring with 12 months of index annual health examination (n = 3 629 859).

| Clinical outcome                       | No. without ECG in 30 d (%)<br>(n = 2 849 676) | No. with ECG in 30 d (%)<br>(n = 780 183) |
|----------------------------------------|------------------------------------------------|-------------------------------------------|
| Death, n (%)                           | 4 614 (0.16%)                                  | <u>1 497 (0.19%)</u>                      |
| Cardiac-related hospitalization, n (%) | 3 523 (0.12%)                                  | <u>3 553 (0.46%)</u>                      |
| Revascularization, n (%)               | 1 066 (0.04%)                                  | <u>1 538 (0.20%)</u>                      |

*Note:* The proportion of deaths occurring due to cardiac-related reasons was not calculated, as cause of death data only available up to 2013.
